# Supplementary material for: Network pharmacology analysis and experimental verification reveal the mechanism of the traditional Chinese medicine YU-Pingfeng San alleviating allergic rhinitis inflammatory responses
Source: Front Plant Sci. 2022 Aug 9;13:934130. doi: 10.3389/fpls.2022.934130 (PMC9396374; doi:10.3389/fpls.2022.934130)
Supplement: Supplementary file 3 [file Table_3.XLSX]

## Sheet: potential drug targets for HQ
active ingredients	Pubchem CID	target genes	Uniprot ID
MOL000398	/	/	/
MOL000378	15689652	ALOX15	P16050
		ALOX12	P18054
		ALOX15B	O15296
		ABL1	P00519
		SYK	P43405
		CMA1	P23946
		CYP19A1	P11511
		F3	P13726
		MAOB	P27338
		ADAMTS5	Q9UNA0
		SIGMAR1	Q99720
		PLA2G7	Q13093
		HSD11B1	P28845
		AURKB	Q96GD4
		MMP1	P03956
		ADAM17	P78536
		WEE1	P30291
		HSP90AA1	P07900
		MET	P08581
		TYMS	P04818
		RET	P07949
		CHEK1	O14757
		NEK1	Q96PY6
		TGFBR1	P36897
		KDR	P35968
		PDE10A	Q9Y233
		KIT	P10721
		MMP7	P09237
		FLT4	P35916
		FLT3	P36888
		PDGFRA	P16234
		PIM1	P11309
		PIM2	Q9P1W9
		GSK3B	P49841
		EGLN1	Q9GZT9
		NDUFA4	O00483
		FGFR1	P11362
		GUSB	P08236
		ALOX5	P09917
		ANPEP	P15144
		MMP16	P51512
		MMP8	P22894
		PPIA	P62937
		PTK2	Q05397
		PLK1	P53350
		CA14	Q9ULX7
		QPCT	Q16769
		DRD2	P14416
		MKNK1	Q9BUB5
		AURKA	O14965
		TAAR1	Q96RJ0
		GCGR	P47871
		JAK3	P52333
		LCK	P06239
		CLK4	Q9HAZ1
		CLK1	P49759
		CLK2	P49760
		CLK3	P49761
		DYRK1B	Q9Y463
		CDC25C	P30307
		CDC25A	P30304
		CDC25B	P30305
		LDHB	P07195
		ALPL	P05186
		NOX4	Q9NPH5
		IMPDH2	P12268
		ATP4B ATP4A	P51164
		CDK2	P24941
		CDK4	P11802
		FASN	P49327
		HSD17B3	P37058
		RPS6KB1	P23443
		CDK1	P06493
		FYN	P06241
		RAF1	P04049
		EPHA2	P29317
		YES1	P07947
		BLK	P51451
		CSK	P41240
		EPHB2	P29323
		BMX	P51813
		LYN	P07948
		EPHA5	P54756
		EPHA4	P54764
		TXK	P42681
		FGR	P09769
		EPHA6	Q9UF33
		PTK6	Q13882
		PDF	Q9HBH1
		EPHB3	P54753
		EPHA3	P29320
		BTK	Q06187
		TYRO3	Q06418
		COQ8B	Q96D53
		EPHA1	P21709
		PLAA	Q9Y263
		FKBP1A	P62942
		CHRNA7	P36544
		QPCTL	Q9NXS2
		CDK1 CCNB1	P06493 P14635
MOL000392	5280378	IL2	P60568
		CYP19A1	P11511
		ALDH2	P05091
		ESR1	P03372
		CA12	O43570
		ADORA1	P30542
		ADORA2A	P29274
		TBXAS1	P24557
		MAOA	P21397
		MGAM	O43451
		HTR2A	P28223
		HTR2C	P28335
		ESRRA	P11474
		ESRRB	O95718
		ABCG2	Q9UNQ0
		CA7	P43166
		HSD17B2	P37059
		CA4	P22748
		CBR1	P16152
		SLC6A2	P23975
		ALOX12	P18054
		EGFR	P00533
		TYR	P14679
		XDH	P47989
		PFKFB3	Q16875
		ESR2	Q92731
		PTPRS	Q13332
		HSD17B1	P14061
		ABCB1	P08183
		ALOX15	P16050
		MIF	P14174
		PPARA	Q07869
		PTGS1	P23219
		TLR9	Q9NR96
		MAOB	P27338
		CA2	P00918
		CA1	P00915
		NOX4	Q9NPH5
		PON1	P27169
		TNKS2	Q9H2K2
		TNKS	O95271
		ACHE	P22303
		CA3	P07451
		CA6	P23280
		CA14	Q9ULX7
		CA13	Q8N1Q1
		CA5B	Q9Y2D0
		CA5A	P35218
		DHODH	Q02127
		STS	P08842
		ERCC5	P28715
		FEN1	P39748
		RAF1	P04049
		CA9	Q16790
		PTPN1	P18031
		BACE1	P56817
MOL000433	6037	TYMS	P04818
		DHFR	P00374
		SLC19A1	P41440
		SLC46A1	Q96NT5
		FOLR1	P15328
		HDAC8	Q9BY41
		FPGS	Q05932
		FOLR2	P14207
		HDAC6	Q9UBN7
		HDAC1	Q13547
		GART	P22102
		ATIC	P31939
		NOS2	P35228
		SLC5A1	P13866
MOL000438	10380176	ALOX15	P16050
		ALOX12	P18054
		ALOX15B	O15296
		KDR	P35968
		RET	P07949
		PIK3R1	P27986
		CDK2	P24941
		EPHB2	P29323
		CHEK1	O14757
		WEE1	P30291
		HSP90AA1	P07900
		NR4A1	P22736
		GSK3B	P49841
		HTT	P42858
		HSP90AB1	P08238
		CYP19A1	P11511
		HSD17B3	P37058
		TYR	P14679
		DAO	P14920
		MET	P08581
		MAPKAPK2	P49137
		RPS6KA2	Q15349
		PIM1	P11309
		PIM2	Q9P1W9
		FLT1	P17948
		EZR	P15311
		CTSS	P25774
		LCK	P06239
		HDAC3	O15379
		HDAC2	Q92769
		NCOR2 HDAC3	Q9Y618 O15379
		HDAC5	Q9UQL6
		HDAC7	Q8WUI4
		NCOR1 HDAC3	O75376 O15379
		HDAC11	Q96DB2
		HDAC4	P56524
		HDAC9	Q9UKV0
		HDAC10	Q969S8
		RAF1	P04049
		ADORA2B	P29275
		VCP	P55072
		MMP8	P22894
		LNPEP	Q9UIQ6
		MIF	P14174
		MMP1	P03956
		DNM1	Q05193
		PIM3	Q86V86
		MMP25	Q9NPA2
		MMP16	P51512
		SYK	P43405
		PLK1	P53350
		ADAM17	P78536
		BMP1	P13497
		MMP7	P09237
		ADAM10	O14672
		SRC	P12931
		FLT3	P36888
		AURKB	Q96GD4
		CSNK1G1	Q9HCP0
		RPS6KA1	Q15418
		ROCK1	Q13464
		BAD	Q92934
		MAPK1	P28482
		CCND1 CDK4	P24385 P11802
		CCNE2 CDK2 CCNE1	O96020 P24941 P24864
		CCND3 CCND1 CDK4 CCND2	P30281 P24385 P11802 P30279
		PDK1	Q15118
		MKNK1	Q9BUB5
		MAOB	P27338
		ADORA2A	P29274
		MTOR	P42345
		PIK3CD	O00329
		PIK3CB	P42338
		PIK3CG	P48736
		PIK3CA	P42336
		PRF1	P14222
		EGFR	P00533
		ALK	Q9UM73
		IMPDH1	P20839
		ABL1	P00519
		IMPDH2	P12268
		HSD17B2	P37059
		PRKCA	P17252
		CDK1	P06493
		CASP3	P42574
		SGK1	O00141
		CASP7	P55210
		TAAR1	Q96RJ0
		CCNB3 CDK1 CCNB1 CCNB2	Q8WWL7 P06493 P14635 O95067
		PTGS1	P23219
		CDK5R1 CDK5	Q15078 Q00535
		CLK1	P49759
		CLK3	P49761
		DYRK2	Q92630
		AURKA	O14965
		SIGMAR1	Q99720
		EP300	Q09472
		PIK3CA PIK3R1	P42336 P27986
		FCER2	P06734
		PDE7A	Q13946
MOL000380	14077830	KDR	P35968
		PTPN1	P18031
		KIT	P10721
		MET	P08581
		RET	P07949
		ABCB1	P08183
		MAP2K1	Q02750
		CDK2	P24941
		FGFR1	P11362
		PIM2	Q9P1W9
		SRC	P12931
		CYP19A1	P11511
		ESR1	P03372
		PARP1	P09874
		CCND3 CCND1 CDK4 CCND2	P30281 P24385 P11802 P30279
		CHEK1	O14757
		WEE1	P30291
		COMT	P21964
		JAK3	P52333
		LCK	P06239
		MKNK1	Q9BUB5
		HSD17B3	P37058
		HTT	P42858
		VCP	P55072
		RPS6KA2	Q15349
		ADORA2A	P29274
		MTOR	P42345
		PIK3CD	O00329
		PIK3CB	P42338
		PIK3CG	P48736
		PIK3CA	P42336
		PTGS1	P23219
		AR	P10275
		GSK3B	P49841
		EZR	P15311
		MAPKAPK2	P49137
		AURKA	O14965
		CA2	P00918
		CA1	P00915
		CA12	O43570
		CA9	Q16790
		ADAM17	P78536
		PIK3R1	P27986
		EPHB2	P29323
		ALOX15	P16050
		RAF1	P04049
		MIF	P14174
		ERN1	O75460
		CA4	P22748
		CA5B	Q9Y2D0
		CA5A	P35218
		MMP8	P22894
		CA14	Q9ULX7
		BMP1	P13497
		MMP9	P14780
		MMP2	P08253
		PDE7A	Q13946
		MMP7	P09237
		MMP25	Q9NPA2
		MMP16	P51512
		CDK4	P11802
		ADAM10	O14672
		ALPL	P05186
		SYK	P43405
		CA13	Q8N1Q1
		LNPEP	Q9UIQ6
		PDE4C	Q08493
		CTSS	P25774
		NR4A1	P22736
		DBF4 CDC7	Q9UBU7 O00311
		HSD17B2	P37059
		ALPG	P10696
		PLAA	Q9Y263
		DNM1	Q05193
		CASP3	P42574
		CASP7	P55210
		PIK3CA PIK3R1	P42336 P27986
		CCNB3 CDK1 CCNB1 CCNB2	Q8WWL7 P06493 P14635 O95067
		HDAC3	O15379
		HDAC2	Q92769
		NCOR2 HDAC3	Q9Y618 O15379
		HDAC5	Q9UQL6
		HDAC7	Q8WUI4
		NCOR1 HDAC3	O75376 O15379
		HDAC11	Q96DB2
		HDAC4	P56524
		HDAC9	Q9UKV0
		ESR2	Q92731
		CDK5R1 CDK5	Q15078 Q00535
		TUBB1	Q9H4B7
		ADORA2B	P29275
		MBD2	Q9UBB5
		CLK1	P49759
		CLK3	P49761
		DYRK2	Q92630
		TUBB3	Q13509
		ALOX12	P18054
		ANPEP	P15144
		GRM4	Q14833
		ABL1	P00519
MOL000211	64971	POLB	P06746
		AKR1B10	O60218
		SAE1 UBA2	Q9UBE0 Q9UBT2
		HSD11B1	P28845
		PTPN1	P18031
		PTGES	O14684
		NR1H4	Q96RI1
		PTPN2	P17706
		CDC25C	P30307
		GPBAR1	Q8TDU6
		TOP2A	P11388
		RORC	P51449
		PTPRF	P10586
		ACP1	P24666
		AR	P10275
		PLA2G1B	P04054
		CDC25B	P30305
		CDC25A	P30304
		CES2	O00748
		PDE4D	Q08499
		FABP1	P07148
		VDR	P11473
		UGT2B7	P16662
		PPARG	P37231
		SCD	O00767
		SERPINA6	P08185
		SHBG	P04278
		G6PD	P11413
		CYP51A1	Q16850
		ALOX5AP	P20292
		CYP19A1	P11511
		HSD17B3	P37058
		GABBR1	Q9UBS5
		PRKCH	P24723
		HSD11B2	P80365
		PTPN11	Q06124
		TERT	O14746
		TOP1	P11387
		NPC1L1	Q9UHC9
		SIGMAR1	Q99720
		CYP17A1	P05093
		GABRA2 GABRB2 GABRG2	P47869 P47870 P18507
		PTGS2	P35354
		MDM2	Q00987
		TLR9	Q9NR96
		FABP2	P12104
		CD81	P60033
		PTPN6	P29350
		PTGER2	P43116
		NR1H3	Q13133
MOL00371	15689655	MET	P08581
		PTPN1	P18031
		SRC	P12931
		KDR	P35968
		ABCB1	P08183
		PTGS1	P23219
		KIT	P10721
		PDE5A	O76074
		PDE3A	Q14432
		PDE2A	O00408
		PDE3B	Q13370
		PDE10A	Q9Y233
		PDGFRB	P09619
		PDGFRA PDGFRB	P16234 P09619
		PDE4C	Q08493
		PRKCE	Q02156
		PRKCH	P24723
		RPS6KA2	Q15349
		CYP19A1	P11511
		ICAM1	P05362
		SELE	P16581
		MAPK8	P45983
		MAPK10	P53779
		MAPK9	P45984
		FGFR1	P11362
		LRRK2	Q5S007
		NPBWR1	P48145
		CNR1	P21554
		CNR2	P34972
		RET	P07949
		GSK3B	P49841
		NTRK1	P04629
		TUBB1	Q9H4B7
		CASP3	P42574
		ADORA2A	P29274
		CASP7	P55210
		CYP11B1	P15538
		CYP11B2	P19099
		SIRT1	Q96EB6
		P2RX7	Q99572
		ADORA2B	P29275
		SCN10A	Q9Y5Y9
		TNKS2	Q9H2K2
		TGFBR1	P36897
		JAK3	P52333
		PPP1CA	P62136
		JAK1	P23458
		JAK2	O60674
		TYK2	P29597
		PIK3CA	P42336
		SYK	P43405
		CMA1	P23946
		CCND3 CCND1 CDK4 CCND2	P30281 P24385 P11802 P30279
		PRKCQ	Q04759
		LIPG	Q9Y5X9
		NAMPT	P43490
		PRKCA	P17252
		FPR1	P21462
		FPR2	P25090
		NR1H3	Q13133
		PARP1	P09874
		NR1H2	P55055
		CA2	P00918
		CA1	P00915
		CA12	O43570
		CA9	Q16790
		PLAT	P00750
		F2	P00734
		PGGT1B FNTA	P53609 P49354
		PRSS1	P07477
		EPHX2	P34913
		PDE7A	Q13946
		PIK3CD	O00329
		PIK3CB	P42338
		CLK1	P49759
		FLT3	P36888
		CDK9 CCNT1	P50750 O60563
		MAPK1	P28482
		PPIA	P62937
		CHEK1	O14757
		CDK2	P24941
		AURKA	O14965
		MDM2	Q00987
		PIK3C2A	O00443
		CCNA2 CDK2	P20248 P24941
		PRKDC	P78527
		BDKRB2	P30411
		PIK3CG	P48736
		TTK	P33981
		PIK3C2B	O00750
		BCL2A1	Q16548
		PTGS2	P35354
		MAP2K1	Q02750
		BAZ2B	Q9UIF8
		CRHR1	P34998
		CSF1R	P07333
		LCK	P06239
		CDK7	P50613
		BAZ2A	Q9UIF9
		UTS2R	Q9UKP6
MOL000239	5318869	ADORA1	P30542
		ADORA3	P0DMS8
		ABCG2	Q9UNQ0
		MCL1	Q07820
		AKR1B1	P15121
		NOX4	Q9NPH5
		PLG	P00747
		ADORA2A	P29274
		ALOX5	P09917
		ABCB1	P08183
		HSD17B1	P14061
		HSD17B2	P37059
		CYP1B1	Q16678
		APP	P05067
		OPRD1	P41143
		OPRM1	P35372
		AURKB	Q96GD4
		CA7	P43166
		CA12	O43570
		BACE1	P56817
		AHR	P35869
		FLT3	P36888
		SYK	P43405
		EGFR	P00533
		ESR2	Q92731
		MMP13	P45452
		MMP9	P14780
		MMP3	P08254
		CDK1	P06493
		CA2	P00918
		CDK2	P24941
		GPR35	Q9HC97
		PTPRS	Q13332
		MPG	P29372
		SLC22A12	Q96S37
		CA6	P23280
		CA14	Q9ULX7
		CA9	Q16790
		CA13	Q8N1Q1
		CA5A	P35218
		CA4	P22748
		SRC	P12931
		ABCC1	P33527
		MMP2	P08253
		ESR1	P03372
		BCHE	P06276
		MET	P08581
		ALOX15	P16050
		PIM1	P11309
		XDH	P47989
		KDM4E	B2RXH2
		TOP2A	P11388
		GLO1	Q04760
		CA3	P07451
		CAMK2B	Q13554
		NEK6	Q9HC98
		APEX1	P27695
		NUAK1	O60285
		AKR1C1	Q04828
		MAOA	P21397
		DAPK1	P53355
		CYP19A1	P11511
		KDR	P35968
		KIT	P10721
		PLK1	P53350
		IGF1R	P08069
		ACHE	P22303
		TERT	O14746
		ESRRA	P11474
		AKR1B10	O60218
		MYLK	Q15746
		PIK3CG	P48736
		CSNK2A1	P68400
		ALK	Q9UM73
		AXL	P30530
		CA1	P00915
		AR	P10275
		ODC1	P11926
		PTGS2	P35354
		GSK3B	P49841
		CDK6	Q00534
		ARG1	P05089
		TNKS2	Q9H2K2
		TNKS	O95271
		TYR	P14679
		TAS2R31	P59538
		AKT1	P31749
		CDK5R1 CDK5	Q15078 Q00535
		CCNB3 CDK1 CCNB1 CCNB2	Q8WWL7 P06493 P14635 O95067
		F2	P00734
		NAE1	Q13564
		AMY1A	P04745
		NOS2	P35228
		PIK3R1	P27986
		PTK2	Q05397
		DRD4	P21917
		AVPR2	P30518
		PTPN1	P18031
		PARP1	P09874
		MMP12	P39900
MOL000354	5281654	XDH	P47989
		CA2	P00918
		CA7	P43166
		CA12	O43570
		CA4	P22748
		CYP1B1	Q16678
		ABCC1	P33527
		NOX4	Q9NPH5
		AKR1B1	P15121
		ABCG2	Q9UNQ0
		IGF1R	P08069
		EGFR	P00533
		ACHE	P22303
		ALOX15	P16050
		ALOX12	P18054
		AVPR2	P30518
		MAOA	P21397
		FLT3	P36888
		CYP19A1	P11511
		F2	P00734
		PIM1	P11309
		ALOX5	P09917
		AURKB	Q96GD4
		DRD4	P21917
		ADORA1	P30542
		GLO1	Q04760
		MPO	P05164
		PIK3R1	P27986
		ADORA2A	P29274
		DAPK1	P53355
		PYGL	P06737
		CA1	P00915
		GSK3B	P49841
		SRC	P12931
		PTK2	Q05397
		HSD17B2	P37059
		KDR	P35968
		MMP13	P45452
		MMP3	P08254
		CA3	P07451
		PLK1	P53350
		CA6	P23280
		CDK1	P06493
		MMP9	P14780
		MMP2	P08253
		PKN1	Q16512
		CA14	Q9ULX7
		CA9	Q16790
		CSNK2A1	P68400
		MET	P08581
		NEK2	P51955
		CXCR1	P25024
		CAMK2B	Q13554
		ALK	Q9UM73
		AKT1	P31749
		ABCB1	P08183
		NEK6	Q9HC98
		PLA2G1B	P04054
		CA5A	P35218
		BACE1	P56817
		AXL	P30530
		NUAK1	O60285
		AKR1C2	P52895
		AKR1C1	Q04828
		AKR1C3	P42330
		AKR1C4	P17516
		CA13	Q8N1Q1
		AKR1A1	P14550
		GPR35	Q9HC97
		MAPT	P10636
		KDM4E	B2RXH2
		TOP2A	P11388
		INSR	P06213
		MYLK	Q15746
		SYK	P43405
		PIK3CG	P48736
		APEX1	P27695
		CDK5R1 CDK5	Q15078 Q00535
		CCNB3 CDK1 CCNB1 CCNB2	Q8WWL7 P06493 P14635 O95067
		CDK6	Q00534
		CDK2	P24941
		ARG1	P05089
		APP	P05067
		MCL1	Q07820
		TERT	O14746
		TYR	P14679
		HSD17B1	P14061
		AHR	P35869
		ESRRA	P11474
		PTPRS	Q13332
		PLG	P00747
		ESR2	Q92731
		MPG	P29372
		SLC22A12	Q96S37
		PARP1	P09874
		TTR	P02766
		MMP12	P39900
		CD38	P28907
		AKR1B10	O60218
		TNKS2	Q9H2K2
MOL000439	15689653	TYR	P14679
		EPHX2	P34913
		SLC5A2	P31639
		SLC5A4	Q9NY91
		SLC5A1	P13866
		ADORA1	P30542
		PTGS1	P23219
		HRAS	P01112
		CHIA	Q9BZP6
		ADORA2A	P29274
		ADORA3	P0DMS8
		CA14	Q9ULX7
MOL000417	5280448	CYP19A1	P11511
		CA7	P43166
		HSD17B2	P37059
		CA12	O43570
		CA4	P22748
		CBR1	P16152
		ABCB1	P08183
		TYR	P14679
		MIF	P14174
		PPARA	Q07869
		HSD17B1	P14061
		ESR1	P03372
		ESR2	Q92731
		TLR9	Q9NR96
		PTPRS	Q13332
		EGFR	P00533
		MAOB	P27338
		PTGS1	P23219
		SLC6A2	P23975
		ALOX12	P18054
		ALDH2	P05091
		XDH	P47989
		IL2	P60568
		TBXAS1	P24557
		MAOA	P21397
		MGAM	O43451
		HTR2A	P28223
		HTR2C	P28335
		ADORA1	P30542
		ADORA2A	P29274
		ESRRA	P11474
		ESRRB	O95718
		ABCG2	Q9UNQ0
		CA2	P00918
		PFKFB3	Q16875
		NOX4	Q9NPH5
		ALOX15	P16050
		CA1	P00915
		PTPN1	P18031
		PON1	P27169
		DUSP3	P51452
		CDC25B	P30305
		CDC7	O00311
		ACHE	P22303
		ABCC1	P33527
		CYP1B1	Q16678
		PLAT	P00750
		F10	P00742
		PLAU	P00749
		STS	P08842
		CA5B	Q9Y2D0
		HSP90AB1	P08238
MOL000098	5280343	NOX4	Q9NPH5
		AVPR2	P30518
		AKR1B1	P15121
		XDH	P47989
		MAOA	P21397
		IGF1R	P08069
		FLT3	P36888
		CYP19A1	P11511
		EGFR	P00533
		F2	P00734
		CA2	P00918
		PIM1	P11309
		ALOX5	P09917
		AURKB	Q96GD4
		DRD4	P21917
		ADORA1	P30542
		CA7	P43166
		GLO1	Q04760
		MPO	P05164
		PIK3R1	P27986
		ADORA2A	P29274
		DAPK1	P53355
		PYGL	P06737
		CA1	P00915
		GSK3B	P49841
		SRC	P12931
		PTK2	Q05397
		HSD17B2	P37059
		KDR	P35968
		MMP13	P45452
		MMP3	P08254
		CA3	P07451
		ALOX15	P16050
		ABCC1	P33527
		PLK1	P53350
		CA6	P23280
		CDK1	P06493
		MMP9	P14780
		CA12	O43570
		MMP2	P08253
		PKN1	Q16512
		CA14	Q9ULX7
		CA9	Q16790
		CSNK2A1	P68400
		ALOX12	P18054
		MET	P08581
		CA4	P22748
		NEK2	P51955
		CXCR1	P25024
		CAMK2B	Q13554
		ALK	Q9UM73
		AKT1	P31749
		ABCB1	P08183
		NEK6	Q9HC98
		PLA2G1B	P04054
		CA5A	P35218
		BACE1	P56817
		CYP1B1	Q16678
		AXL	P30530
		ABCG2	Q9UNQ0
		NUAK1	O60285
		AKR1C2	P52895
		AKR1C1	Q04828
		AKR1C3	P42330
		AKR1C4	P17516
		CA13	Q8N1Q1
		AKR1A1	P14550
		GPR35	Q9HC97
		SYK	P43405
		MAPT	P10636
		KDM4E	B2RXH2
		TOP2A	P11388
		INSR	P06213
		ACHE	P22303
		MYLK	Q15746
		PIK3CG	P48736
		APEX1	P27695
		CDK5R1 CDK5	Q15078 Q00535
		CCNB3 CDK1 CCNB1 CCNB2	Q8WWL7 P06493 P14635 O95067
		ARG1	P05089
		PTPRS	Q13332
		ESR2	Q92731
		MPG	P29372
		SLC22A12	Q96S37
		CDK6	Q00534
		CDK2	P24941
		TYR	P14679
		HSD17B1	P14061
		AHR	P35869
		ESRRA	P11474
		APP	P05067
		PARP1	P09874
		TTR	P02766
		MMP12	P39900
		CD38	P28907
		AKR1B10	O60218
		TNKS2	Q9H2K2
		TNKS	O95271
		TOP1	P11387
		TERT	O14746
MOL000422	5280863	NOX4	Q9NPH5
		AKR1B1	P15121
		XDH	P47989
		TYR	P14679
		FLT3	P36888
		CA2	P00918
		ALOX5	P09917
		CA7	P43166
		HSD17B2	P37059
		ABCC1	P33527
		HSD17B1	P14061
		AHR	P35869
		CA12	O43570
		ESRRA	P11474
		ABCB1	P08183
		CYP1B1	Q16678
		ABCG2	Q9UNQ0
		ADORA1	P30542
		CA4	P22748
		ACHE	P22303
		MAOA	P21397
		GLO1	Q04760
		SYK	P43405
		GSK3B	P49841
		MMP9	P14780
		MMP2	P08253
		ALOX15	P16050
		ALOX12	P18054
		PTPRS	Q13332
		ADORA2A	P29274
		CDK5R1 CDK5	Q15078 Q00535
		CCNB3 CDK1 CCNB1 CCNB2	Q8WWL7 P06493 P14635 O95067
		ARG1	P05089
		GPR35	Q9HC97
		ESR2	Q92731
		DAPK1	P53355
		MPG	P29372
		SLC22A12	Q96S37
		CDK6	Q00534
		CDK2	P24941
		TTR	P02766
		AKR1B10	O60218
		TNKS2	Q9H2K2
		TNKS	O95271
		CYP19A1	P11511
		CSNK2A1	P68400
		EGFR	P00533
		AVPR2	P30518
		IGF1R	P08069
		F2	P00734
		PIM1	P11309
		AURKB	Q96GD4
		DRD4	P21917
		MPO	P05164
		PIK3R1	P27986
		PYGL	P06737
		CA1	P00915
		SRC	P12931
		PTK2	Q05397
		KDR	P35968
		MMP13	P45452
		MMP3	P08254
		CA3	P07451
		PLK1	P53350
		CA6	P23280
		CDK1	P06493
		PKN1	Q16512
		CA14	Q9ULX7
		CA9	Q16790
		MET	P08581
		NEK2	P51955
		CXCR1	P25024
		CAMK2B	Q13554
		ALK	Q9UM73
		AKT1	P31749
		NEK6	Q9HC98
		PLA2G1B	P04054
		CA5A	P35218
		BACE1	P56817
		AXL	P30530
		NUAK1	O60285
		AKR1C2	P52895
		AKR1C1	Q04828
		AKR1C3	P42330
		AKR1C4	P17516
		CA13	Q8N1Q1
		AKR1A1	P14550
		APP	P05067
		PARP1	P09874
		MMP12	P39900
		CD38	P28907
		TOP1	P11387
		ESR1	P03372
		PTGS2	P35354
		CFTR	P13569
		PFKFB3	Q16875
		AMY1A	P04745
		GRK6	P43250
		TERT	O14746
		BCHE	P06276
MOL000374	/	/	/
MOL000442	5316760	PLA2G1B	P04054
MOL000296	/	/	/
MOL000379	/	/	/
MOL000033	15976101	AR	P10275
		HMGCR	P04035
		CYP51A1	Q16850
		NPC1L1	Q9UHC9
		NR1H3	Q13133
		RORC	P51449
		CYP17A1	P05093
		ESR2	Q92731
		SREBF2	Q12772
		ESR1	P03372
		SHBG	P04278
		CYP19A1	P11511
		RORA	P35398
		CYP2C19	P33261
		SLC6A2	P23975
		PTPN1	P18031
		SERPINA6	P08185
		SLC6A4	P31645
		BCHE	P06276
		NR1I3	Q14994
		ACHE	P22303
		VDR	P11473
		CHRM2	P08172
		CDC25A	P30304
		G6PD	P11413
		NR1H2	P55055
		CES2	O00748
		GLRA1	P23415
		PTGER1	P34995
		PTGER2	P43116
		PPARA	Q07869
		PPARD	Q03181
		DHCR7	Q9UBM7
		SQLE	Q14534
		HSD11B1	P28845
		PTPN6	P29350
		FDFT1	P37268
		PPARG	P37231
		NOS2	P35228
		UGT2B7	P16662
		POLB	P06746
		PREP	P48147
MOL000387	108213	GSK3B	P49841
		SYK	P43405
		EGFR	P00533
		OXTR	P30559
		JAK3	P52333
		PTK2	Q05397
		F2	P00734
		ABCG2	Q9UNQ0
		AVPR2	P30518
		AVPR1A	P37288
		CMA1	P23946
		CTSG	P08311
		JUN	P05412

## Sheet: potential drug targets for BZ
active ingredients	Pubchem CID	target genes	Uniprot ID
MOL000020	/	/	/
MOL000021	/	/	/
MOL000022	/	/	/
MOL000028	/	/	/
MOL000033	15976101	AR	P10275
		HMGCR	P04035
		CYP51A1	Q16850
		NPC1L1	Q9UHC9
		NR1H3	Q13133
		RORC	P51449
		CYP17A1	P05093
		ESR2	Q92731
		SREBF2	Q12772
		ESR1	P03372
		SHBG	P04278
		CYP19A1	P11511
		RORA	P35398
		CYP2C19	P33261
		SLC6A2	P23975
		PTPN1	P18031
		SERPINA6	P08185
		SLC6A4	P31645
		BCHE	P06276
		NR1I3	Q14994
		ACHE	P22303
		VDR	P11473
		CHRM2	P08172
		CDC25A	P30304
		G6PD	P11413
		NR1H2	P55055
		CES2	O00748
		GLRA1	P23415
		PTGER1	P34995
		PTGER2	P43116
		PPARA	Q07869
		PPARD	Q03181
		DHCR7	Q9UBM7
		SQLE	Q14534
		HSD11B1	P28845
		PTPN6	P29350
		FDFT1	P37268
		PPARG	P37231
		NOS2	P35228
		UGT2B7	P16662
		POLB	P06746
		PREP	P48147
MOL000049	/	/	/
MOL000072	14448075	PLA2G1B	P04054
		RPS6KA5	O75582
		CYP19A1	P11511
		GLRA2	P23416
		ATP12A	P54707
		TTL	Q8NG68
		MAPK14	Q16539
		CDK5R1 CDK5	Q15078 Q00535
		EPHX2	P34913
		KCNH2	Q12809
		HCRTR2	O43614
		HCRTR1	O43613
		AR	P10275
		PGR	P06401
		TGFBR1	P36897
		MAP2K1	Q02750
		CCNC CDK8	P24863 P49336
		MTNR1A	P48039
		MTNR1B	P49286
		SLC6A3	Q01959
		MMP13	P45452
		CACNA1B	Q00975
		GLRA1	P23415
		CDC25A	P30304
		CDC25B	P30305
		PSEN2 PSENEN NCSTN APH1A PSEN1 APH1B	P49810 Q9NZ42 Q92542 Q96BI3 P49768 Q8WW43
		RIPK3	Q9Y572
		RIPK2	O43353
		CSF1R	P07333
		CA12	O43570
		CA9	Q16790
		CTSL	P07711
		CTSB	P07858
		PLA2G2A	P14555
		NQO2	P16083
		NAT1	P18440

## Sheet: potential drug targets for FF
active ingredients	Pubchem CID	target genes	Uniprot ID
MOL000358	222284	AR	P10275
		HMGCR	P04035
		CYP51A1	Q16850
		NPC1L1	Q9UHC9
		NR1H3	Q13133
		CYP19A1	P11511
		CYP17A1	P05093
		RORC	P51449
		ESR1	P03372
		ESR2	Q92731
		SREBF2	Q12772
		SHBG	P04278
		SLC6A2	P23975
		CYP2C19	P33261
		RORA	P35398
		PTPN1	P18031
		BCHE	P06276
		SERPINA6	P08185
		SLC6A4	P31645
		CHRM2	P08172
		VDR	P11473
		ACHE	P22303
		G6PD	P11413
		NR1H2	P55055
		GLRA1	P23415
		CES2	O00748
		PTGER1	P34995
		PTGER2	P43116
		HSD11B1	P28845
		PTGES	O14684
		CDC25A	P30304
		PPARA	Q07869
		PPARD	Q03181
		DHCR7	Q9UBM7
		SQLE	Q14534
		PTPN6	P29350
		NR1I3	Q14994
		FDFT1	P37268
		SIGMAR1	Q99720
		NOS2	P35228
		NR3C1	P04150
		PPARG	P37231
		CDC25B	P30305
		UGT2B7	P16662
		HSD11B2	P80365
		POLB	P06746
MOL000359	12303645	AR	P10275
		HMGCR	P04035
		CYP51A1	Q16850
		NPC1L1	Q9UHC9
		NR1H3	Q13133
		CYP19A1	P11511
		CYP17A1	P05093
		RORC	P51449
		ESR1	P03372
		ESR2	Q92731
		SREBF2	Q12772
		SHBG	P04278
		SLC6A2	P23975
		CYP2C19	P33261
		RORA	P35398
		PTPN1	P18031
		BCHE	P06276
		SERPINA6	P08185
		SLC6A4	P31645
		CHRM2	P08172
		VDR	P11473
		ACHE	P22303
		G6PD	P11413
		NR1H2	P55055
		GLRA1	P23415
		CES2	O00748
		PTGER1	P34995
		PTGER2	P43116
		HSD11B1	P28845
		PTGES	O14684
		CDC25A	P30304
		PPARA	Q07869
		PPARD	Q03181
		DHCR7	Q9UBM7
		SQLE	Q14534
		PTPN6	P29350
		NR1I3	Q14994
		FDFT1	P37268
		SIGMAR1	Q99720
		NOS2	P35228
		NR3C1	P04150
		PPARG	P37231
		CDC25B	P30305
		UGT2B7	P16662
		HSD11B2	P80365
		POLB	P06746
MOL000011	442510	CTSV	O60911
		PRKCD	Q05655
		CDK2	P24941
		CDK1	P06493
		PIK3CA	P42336
		RET	P07949
		AKR1B10	O60218
		SYK	P43405
		CHEK1	O14757
		WEE1	P30291
		LNPEP	Q9UIQ6
		MAP2K1	Q02750
		EIF4A1	P60842
		TOP1	P11387
		ABL1	P00519
		EGFR	P00533
		MTOR	P42345
		PIK3CD	O00329
		PRKDC	P78527
		PIK3CB	P42338
		HCK	P08631
		PIK3CG	P48736
		PI4KB	Q9UBF8
		EPHB4	P54760
		PIK3C2A	O00443
		PIK3C2G	O75747
		PIP4K2C	Q8TBX8
		RAF1	P04049
		FLT3	P36888
		PIK3CA PIK3R1	P42336 P27986
		FKBP1A MTOR	P62942 P42345
		MYLK	Q15746
		DAPK3	O43293
		ADORA2A	P29274
		DAPK1	P53355
		PYGL	P06737
		ADORA3	P0DMS8
		JAK1	P23458
		PAK3	O75914
		CDK7	P50613
		DAPK2	Q9UIK4
		CHUK	O15111
		TYK2	P29597
		CSNK2A1	P68400
		CSNK2A2	P19784
		CLK1	P49759
		CLK2	P49760
		CLK3	P49761
		DYRK2	Q92630
		PAK2	Q13177
		CDC42BPA	Q5VT25
		HIPK2	Q9H2X6
		HIPK3	Q9H422
		PAK1	Q13153
		BRAF	P15056
		HIPK1	Q86Z02
		DYRK1B	Q9Y463
		PIK3C2B	O00750
		LIMK2	P53671
		RIOK2	Q9BVS4
		MAP3K19	Q56UN5
		KCNH2	Q12809
		CFTR	P13569
		AKT1	P31749
		MMP8	P22894
		CXCR2	P25025
		CXCR1	P25024
		FLT1	P17948
		ADORA1	P30542
		MMP13	P45452
		ADCY1	Q08828
		MMP1	P03956
		DRD1	P21728
		DRD2	P14416
		ADAM17	P78536
		SLC5A2	P31639
		MAP3K14	Q99558
		MMP3	P08254
		HSP90AA1	P07900
		HSP90AB1	P08238
		JUN	P05412
		F9	P00740
		NTRK1	P04629
		EDNRB	P24530
		EDNRA	P25101
		PDK1	Q15118
		ABCC1	P33527
		ADRB3	P13945
		TARS	P26639
		AKT2	P31751
		POLK	Q9UBT6
		MAP3K7	O43318
		ERBB2	P04626
		HDAC6	Q9UBN7
		HDAC2	Q92769
		HDAC1	Q13547
		HMGCR	P04035
		MMP7	P09237
		ADAM10	O14672
		FLT4	P35916
MOL011732	6859585	CNR1	P21554
		CNR2	P34972
		ELANE	P08246
		CSF1R	P07333
		CTSS	P25774
		CTSV	O60911
		CTSL	P07711
		SCN9A	Q15858
		KCNJ6 KCNJ3	P48051 P48549
		RBP4	P02753
		HCRTR2	O43614
		KDR	P35968
		KCNJ5 KCNJ3	P48544 P48549
		GRM5	P41594
		HCRTR1	O43613
		KCNK3	O14649
		KCNK9	Q9NPC2
		P2RX3	P56373
		ADORA3	P0DMS8
		SCN2A	Q99250
		SCN10A	Q9Y5Y9
		CCND1 CDK4	P24385 P11802
		PPIA	P62937
		CCNE2 CDK2 CCNE1	O96020 P24941 P24864
		CCNB3 CDK1 CCNB1 CCNB2	Q8WWL7 P06493 P14635 O95067
		PDE4B	Q07343
		MMP9	P14780
		ELOVL6	Q9H5J4
		ADORA1	P30542
		ADORA2A	P29274
		GRK2	P25098
		P2RX7	Q99572
		TSPO	P30536
		SAE1 UBA2	Q9UBE0 Q9UBT2
		CHRM1	P11229
		FLT3	P36888
		IDH1	O75874
		CHRM2	P08172
		JAK3	P52333
		F10	P00742
		JAK2	O60674
		ROCK1	Q13464
		CMA1	P23946
		VCP	P55072
		CXCR2	P25025
		CHRM3	P20309
		GSK3B	P49841
		PTGS2	P35354
		GCK	P35557
		TACR3	P29371
		NPY5R	Q15761
		CASP3	P42574
		CTSK	P43235
		MMP3	P08254
		PRKDC	P78527
		MMP1	P03956
		CASP7	P55210
		MAPK11	Q15759
		PDE10A	Q9Y233
		PABPC1	P11940
		ITGAV ITGB3	P06756 P05106
		EGFR	P00533
		HTR1A	P08908
		CFD	P00746
		DRD2	P14416
		SRC	P12931
		TGM2	P21980
		GRM4	Q14833
		TGM1	P22735
		HTR7	P34969
		HTR6	P50406
		BDKRB1	P46663
		F13A1	P00488
		ABL1	P00519
		PIM1	P11309
		PDE7A	Q13946
		PDE9A	O76083
		TYK2	P29597
		NOS1	P29475
		NOS2	P35228
		PIM2	Q9P1W9
		CCND3 CCND1 CDK4 CCND2	P30281 P24385 P11802 P30279
		PTK2	Q05397
		TRPV1	Q8NER1
		TRPA1	O75762
		CPT1A	P50416
		FAAH	O00519
		PFKFB3	Q16875
		NTRK1	P04629
		NTRK2	Q16620
		NTRK3	Q16288
		CHRM4	P08173
		FLT1	P17948
		CYP11B1	P15538
		CYP19A1	P11511
		DRD4	P21917
		CYP11B2	P19099
		GRM2	Q14416
		IKBKB	O14920
		CTSD	P07339
MOL011747	/	/	/
MOL013077	442126	PARP1	P09874
		NAAA	Q02083
		ASAH1	Q13510
		NPY5R	Q15761
		MTNR1A	P48039
		MTNR1B	P49286
		PDE4D	Q08499
		GCGR	P47871
		CRHR1	P34998
		CTSK	P43235
		GRM5	P41594
		GRM1	Q13255
		IDH1	O75874
		AURKB	Q96GD4
		GSK3B	P49841
		JAK2	O60674
		ROCK2	O75116
		OGT	O15294
		RPS6KB1	P23443
		AURKA	O14965
		SCD	O00767
		SRC	P12931
		SCN9A	Q15858
		DUT	P33316
		ABL1	P00519
		CCNB3 CDK1 CCNB1 CCNB2	Q8WWL7 P06493 P14635 O95067
		PIM1	P11309
		PDE4A	P27815
		PDE4B	Q07343
		PDE4C	Q08493
		TRPV1	Q8NER1
		HTR1A	P08908
		PTPN1	P18031
		MMP1	P03956
		MAP4K4	O95819
		HPGD	P15428
		DRD1	P21728
		FFAR1	O14842
		HCRTR2	O43614
		HCRTR1	O43613
		CDK2 CCNA1 CCNA2	P24941 P78396 P20248
		PDE3A	Q14432
		PDE3B	Q13370
		PLK1	P53350
		ADK	P55263
		HSD11B1	P28845
		PLK3	Q9H4B4
		SLC5A1	P13866
		GRK5	P34947
		PLK2	Q9NYY3
		EPHX2	P34913
		PIK3CG	P48736
		GRM2	Q14416
		BRD4	O60885
		CHEK2	O96017
		JAK1	P23458
		PDE10A	Q9Y233
		SNCA	P37840
		CHRM1	P11229
		KDR	P35968
		ALOX5AP	P20292
		CTSS	P25774
		CTSB	P07858
		PKM	P14618
		CCNC CDK8	P24863 P49336
		CDC7	O00311
		CDK8	P49336
		SRD5A2	P31213
		FNTA FNTB	P49354 P49356
		ADAMTS5	Q9UNA0
		PARP2	Q9UGN5
		CFD	P00746
		TBXAS1	P24557
		RAF1	P04049
		TDP2	O95551
		ICAM1	P05362
		VCAM1	P19320
		SELE	P16581
		RORC	P51449
		MMP13	P45452
		MMP3	P08254
		CDK2	P24941
		MMP9	P14780
		MMP8	P22894
		CHRNA4 CHRNB2	P43681 P17787
		CCND1 CDK4	P24385 P11802
		DRD4	P21917
		DRD3	P35462
		CHRNA7	P36544
		HSD17B2	P37059
		HSD17B1	P14061
		PLAU	P00749
		SIRT2	Q8IXJ6
		PIM2	Q9P1W9
		SCN10A	Q9Y5Y9
		EIF2AK2	P19525
		GRIA1	P42261
		GABRB3 GABRA3 GABRG2	P28472 P34903 P18507
		GABRB3 GABRG2 GABRA1	P28472 P18507 P14867
		GABRB3 GABRG2 GABRA5	P28472 P18507 P31644
MOL011740	/	/	/
MOL011737	/	/	/
MOL011749	/	/	/
MOL002644	98608	BACE1	P56817
		MAOA	P21397
		PIK3CA	P42336
		DRD4	P21917
		GABRB3 GABRA3 GABRG2	P28472 P34903 P18507
		GABRB3 GABRG2 GABRA1	P28472 P18507 P14867
		GABRB3 GABRG2 GABRA5	P28472 P18507 P31644
		GABRA2 GABRB3 GABRG2	P47869 P28472 P18507
		MAPK14	Q16539
		FLT3	P36888
		JAK1	P23458
		JAK2	O60674
		TYK2	P29597
		ADORA2A	P29274
		NUDT1	P36639
		CDK1 CCNB1	P06493 P14635
		CYP19A1	P11511
		MCHR1	Q99705
		PIK3CB	P42338
		PIK3CG	P48736
		MTOR	P42345
		PIK3CD	O00329
		DUT	P33316
		MAOB	P27338
		CCNE2 CDK2 CCNE1	O96020 P24941 P24864
		PRKDC	P78527
		GYS1	P13807
		PDE8B	O95263
		SRD5A1	P18405
		ADORA2B	P29275
		TAAR1	Q96RJ0
		KCNA3	P22001
		PDE10A	Q9Y233
		HCAR2	Q8TDS4
		CA9	Q16790
		PDE5A	O76074
		SLC9A1	P19634
		HSF1	Q00613
		KCNH2	Q12809
		PDPK1	O15530
		NAAA	Q02083
		CA2	P00918
		CA1	P00915
		DNMT3A	Q9Y6K1
		CCND3 CCND1 CDK4 CCND2	P30281 P24385 P11802 P30279
		EDNRA	P25101
		CYP1A2	P05177
		PTGES	O14684
		KCNA5	P22460
		RPS6KB1	P23443
		MAP2K1	Q02750
		ALPL	P05186
		APP	P05067
		CCKBR	P32239
		PLA2G7	Q13093
		CD38	P28907
		PARP1	P09874
		CDC7	O00311
		PIM1	P11309
		HSP90AA1	P07900
		HRH3	Q9Y5N1
		PTGER3	P43115
		HRH4	Q9H3N8
		JAK3	P52333
		MAPK8	P45983
		CRHR1	P34998
		IMPDH2	P12268
		PDE2A	O00408
		DYRK1A	Q13627
		CLK4	Q9HAZ1
		ACHE	P22303
MOL011730	/	/	/
MOL011753	441970	/	/
MOL000173	5281703	PTGS2	P35354
		NOS2	P35228
		FLT3	P36888
		AKR1B1	P15121
		IKBKB	O14920
		NTRK2	Q16620
		ABCB1	P08183
		OPRD1	P41143
		KIT	P10721
		KDM4E	B2RXH2
		XDH	P47989
		ALOX15	P16050
		CDK1	P06493
		ALOX12	P18054
		GRK6	P43250
		OPRM1	P35372
		CYP19A1	P11511
		PIK3CG	P48736
		SLC22A12	Q96S37
		ESR2	Q92731
		CYP1A1	P04798
		EGFR	P00533
		MCL1	Q07820
		ABCG2	Q9UNQ0
		ESR1	P03372
		CYP1B1	Q16678
		CA4	P22748
		PIM1	P11309
		CA2	P00918
		CA1	P00915
		TERT	O14746
		ADORA1	P30542
		ADORA2A	P29274
		HSD17B2	P37059
		HSD17B1	P14061
		CA7	P43166
		CA12	O43570
		CDK5R1 CDK5	Q15078 Q00535
		CCNB3 CDK1 CCNB1 CCNB2	Q8WWL7 P06493 P14635 O95067
		CDK6	Q00534
		CA9	Q16790
		CBR1	P16152
		LCK	P06239
		AR	P10275
		CA6	P23280
		MET	P08581
		PTPRS	Q13332
		DAPK1	P53355
		MPG	P29372
		GPR35	Q9HC97
		PFKFB3	Q16875
		HSP90AA1	P07900
		MMP9	P14780
		MMP2	P08253
		MMP12	P39900
		CD38	P28907
		TOP1	P11387
		ARG1	P05089
		MAPT	P10636
		TOP2A	P11388
		INSR	P06213
		MYLK	Q15746
		MPO	P05164
		PIK3R1	P27986
		PYGL	P06737
		MMP13	P45452
		MMP3	P08254
		CA3	P07451
		CA14	Q9ULX7
		CA13	Q8N1Q1
		CAMK2B	Q13554
		PLA2G1B	P04054
		CA5A	P35218
		APEX1	P27695
		AKR1C2	P52895
		AKR1C1	Q04828
		AKR1C3	P42330
		AKR1C4	P17516
		AKR1A1	P14550
		CYP1A2	P05177
		CXCR1	P25024
		ADORA3	P0DMS8
		ODC1	P11926
		HSP90B1	P14625
		SRC	P12931
		ALOX5	P09917
		PLA2G2A	P14555
		PDE5A	O76074
		GSK3B	P49841
		TNKS	O95271
		BCHE	P06276
		ACHE	P22303
		APP	P05067
		ABCC1	P33527
		TNKS2	Q9H2K2
		TTR	P02766
		BACE1	P56817
		AVPR2	P30518
		NAE1	Q13564
		NOX4	Q9NPH5
MOL007514	5365566	CNR1	P21554
		PTGS1	P23219
		FABP4	P15090
		PPARA	Q07869
		FABP3	P05413
		PPARG	P37231
		FAAH	O00519
		FFAR1	O14842
		PTGS2	P35354
		HSD11B1	P28845
		PPARD	Q03181
		SCD	O00767
		FABP5	Q01469
		FABP1	P07148
		CES2	O00748
		PTPN1	P18031
		CNR2	P34972
		NR1H3	Q13133
		CYP19A1	P11511
		PTGES	O14684
		OXTR	P30559
		PSEN2 PSENEN NCSTN APH1A PSEN1 APH1B	P49810 Q9NZ42 Q92542 Q96BI3 P49768 Q8WW43
		MCL1	Q07820
		BCL2	P10415
		RARG	P13631
		RARB	P10826
		RARA	P10276
		ALOX5	P09917
		IDH1	O75874
		F2R	P25116
		SSTR4	P31391
		CYP17A1	P05093
		RAF1	P04049
		GCK	P35557
		FKBP1A	P62942
		CALCRL RAMP1	Q16602 O60894
		KCNH2	Q12809
		ROCK2	O75116
		ROCK1	Q13464
		HRH3	Q9Y5N1
		NPY5R	Q15761
		TRPV1	Q8NER1
		HTR2A	P28223
		HTR2C	P28335
		HRH4	Q9H3N8
		PDGFRB	P09619
		KDR	P35968
		PARP2	Q9UGN5
		TNKS	O95271
		ADRA2A	P08913
		ADRA2C	P18825
		AURKB	Q96GD4
		JAK2	O60674
		ALOX5AP	P20292
		NOS2	P35228
		JAK1	P23458
		PTPRF	P10586
		ACP1	P24666
		MAPK10	P53779
		QPCT	Q16769
		RORC	P51449
		NAMPT	P43490
		HPGD	P15428
		CALCRL	Q16602
		SMO	Q99835
		SOAT1	P35610
		NPY1R	P25929
		HSD11B2	P80365
		CRHR1	P34998
		C5AR1	P21730
		SRC	P12931
		ASAH1	Q13510
		LIMK2	P53671
		AR	P10275
		ERN1	O75460
		MAPT	P10636
		ABL1	P00519
		CASR	P41180
		INSR	P06213
		APP	P05067
		KIF11	P52732
		SNCA	P37840
		EPHX1	P07099
		SGPL1	O95470
		PTPN2	P17706
		GRIN1 GRIN2B	Q05586 Q13224
		CYP11B1	P15538
		CYP11B2	P19099
MOL001942	68081	BACE1	P56817
		KCNA3	P22001
		SRD5A1	P18405
		CA12	O43570
		CA9	Q16790
		KCNA5	P22460
		MAOA	P21397
		ALOX5	P09917
		MAOB	P27338
		ALOX15	P16050
		CA7	P43166
		CA14	Q9ULX7
		CA13	Q8N1Q1
		CA5B	Q9Y2D0
		CD38	P28907
		OPRK1	P41145
		CBR1	P16152
		PIK3CD	O00329
		PIK3CB	P42338
		PIK3CG	P48736
		PIK3CA	P42336
		PDE7A	Q13946
		MTNR1A	P48039
		CA6	P23280
		PTGES	O14684
		METAP2	P50579
		HSD11B1	P28845
		PDE10A	Q9Y233
		LIMK1	P53667
		CCR9	P51686
		PARP1	P09874
		P2RX7	Q99572
		PARP2	Q9UGN5
		DNMT3A	Q9Y6K1
		CDK1 CCNB1	P06493 P14635
		HMGCR	P04035
		ADORA2B	P29275
		MTOR	P42345
		CA1	P00915
		HPGDS	O60760
		AKR1C1	Q04828
		ATM	Q13315
		PDE8B	O95263
		CA4	P22748
		BRD4	O60885
MOL001941	10212	MAOA	P21397
		ACHE	P22303
		KCNA3	P22001
		BACE1	P56817
		CYP1A2	P05177
		GABRB3 GABRA3 GABRG2	P28472 P34903 P18507
		GABRB3 GABRG2 GABRA1	P28472 P18507 P14867
		GABRB3 GABRG2 GABRA5	P28472 P18507 P31644
		GABRA2 GABRB3 GABRG2	P47869 P28472 P18507
		CYP19A1	P11511
		MAPK14	Q16539
		ADORA2B	P29275
		NOS2	P35228
		ADORA1	P30542
		NTRK1	P04629
		PDE10A	Q9Y233
		ADRA2A	P08913
		ADRA2C	P18825
		ADRA2B	P18089
		ADRA1B	P35368
		JAK2	O60674
		HDAC3	O15379
		HDAC2	Q92769
		HDAC1	Q13547
		CSNK1D	P48730
		FNTA FNTB	P49354 P49356
		PGGT1B FNTA	P53609 P49354
		CCNE2 CDK2 CCNE1	O96020 P24941 P24864
		TAAR1	Q96RJ0
		PGGT1B	P53609
		PTGER1	P34995
		MTOR	P42345
		PIK3CD	O00329
		PIK3CB	P42338
		PIK3CG	P48736
		MCHR1	Q99705
		PIK3CA	P42336
		GRM5	P41594
		PRKDC	P78527
		PDE5A	O76074
		BRS3	P32247
		MAOB	P27338
		TGFBR1	P36897
		PTK2B	Q14289
		FAAH	O00519
		GYS1	P13807
		GSK3A	P49840
		CLK4	Q9HAZ1
		HSF1	Q00613
		PDE8B	O95263
		DYRK1A	Q13627
		PGR	P06401
		MAPK8	P45983
		MAPKAPK2	P49137
		CSNK1G1	Q9HCP0
		CCR2	P41597
		PPOX	P50336
		PIM1	P11309
		ADRA1A	P35348
		CA9	Q16790
		PTGER4	P35408
		PTGER2	P43116
		BCHE	P06276
		PTGER3	P43115
		HCRTR2	O43614
		HCRTR1	O43613
		CNR1	P21554
		CNR2	P34972
		SRD5A1	P18405
		PTGS1	P23219
		PTGS2	P35354
		MAP2K1	Q02750
		NAAA	Q02083
		CA12	O43570
		FLT3	P36888
		PTAFR	P25105
		HRH3	Q9Y5N1
		JAK1	P23458
		TYK2	P29597
MOL003588	69502	SLC6A4	P31645
		SLC6A2	P23975
		SLC6A3	Q01959
		CA9	Q16790
		DRD2	P14416
		DRD4	P21917
		DRD3	P35462
		MDM2	Q00987
		CHRM4	P08173
		ADRA2C	P18825
		CHRM5	P08912
		CHRM2	P08172
		OPRM1	P35372
		OPRK1	P41145
		CHRM3	P20309
		SIGMAR1	Q99720
		HDAC6	Q9UBN7
		HDAC2	Q92769
		SRD5A1	P18405
		TNKS2	Q9H2K2
		TNKS	O95271
		PIK3CG	P48736
		PIK3CA	P42336
		HSP90AB1	P08238
		HDAC1	Q13547
		EDNRA	P25101
		CA13	Q8N1Q1
		HDAC8	Q9BY41
		MMP9	P14780
		MMP1	P03956
		MMP2	P08253
MOL001494	5282184	FAAH	O00519
		CNR1	P21554
		CNR2	P34972
		CYP19A1	P11511
		CYP17A1	P05093
		CES2	O00748
		FABP4	P15090
		FABP3	P05413
		PTGES	O14684
		HSD11B1	P28845
		AR	P10275
		PTGS1	P23219
		PPARG	P37231
		PTGS2	P35354
		PTPN1	P18031
		C5AR1	P21730
		HSD17B2	P37059
		F2R	P25116
		PRKCQ	Q04759
		NR3C1	P04150
		PGR	P06401
		TNKS	O95271
		LIMK2	P53671
		HMGCR	P04035
		PFKFB3	Q16875
		AKR1C3	P42330
		FLT1	P17948
		PDGFRB	P09619
		KIT	P10721
		KDR	P35968
		FFAR1	O14842
		HRH4	Q9H3N8
		PPARA	Q07869
		AKR1C2	P52895
		AKR1C1	Q04828
		ALOX5AP	P20292
		CDC7	O00311
		NR1H3	Q13133
		GABRB3 GABRA3 GABRG2	P28472 P34903 P18507
		GABRB3 GABRG2 GABRA1	P28472 P18507 P14867
		GABRB3 GABRG2 GABRA5	P28472 P18507 P31644
		GABRA2 GABRB3 GABRG2	P47869 P28472 P18507
		ACACB	O00763
		HRH3	Q9Y5N1
		FABP5	Q01469
		FABP1	P07148
		RARG	P13631
		RARB	P10826
		RARA	P10276
		RXRA	P19793
		RXRG	P48443
		NR3C2	P08235
		FNTA FNTB	P49354 P49356
		PRKCD	Q05655
		PDE6D	O43924
		PPARD	Q03181
		CDK1	P06493
		NPY2R	P49146
		GRIN2B	Q13224
		MGAT2	Q10469
		CTSK	P43235
		JAK1	P23458
		PRKCA	P17252
		SLC6A9	P48067
		GCK	P35557
		NPY5R	Q15761
		ASAH1	Q13510
		QPCT	Q16769
		TACR1	P25103
		PTGIR	P43119
		ABL1	P00519
		MTNR1A	P48039
		MTNR1B	P49286
		KCNK3	O14649
		SRC	P12931
		ALOX5	P09917
		MAP3K5	Q99683
		KCNQ3 KCNQ2	O43525 O43526
		JAK2	O60674
		RBP4	P02753
		TBXA2R	P21731
		POLB	P06746
		PTAFR	P25105
		PDE10A	Q9Y233
		HSD11B2	P80365
		CETP	P11597
		LIPE	Q05469
		PARP2	Q9UGN5
		CYP2C19	P33261
		IMPDH2	P12268
		PSEN2 PSENEN NCSTN APH1A PSEN1 APH1B	P49810 Q9NZ42 Q92542 Q96BI3 P49768 Q8WW43
		SOAT1	P35610
		ITK	Q08881
		AOC3	Q16853
		SOAT2	O75908
		KIF11	P52732
		CASR	P41180
		GRM5	P41594
		ROCK1	Q13464
		MAP3K8	P41279
